# Supplementary material for: Performance and usability testing of an automated tool for detection of peripheral artery disease using electronic health records
Source: PubMed Central journal article supplement (PMC9349186; doi:10.1038/s41598-022-17180-5), 2022-08-03
Supplement: 41598_2022_17180_MOESM1_ESM.pdf [file 41598_2022_17180_MOESM1_ESM.pdf]

# **Performance and usability testing of an automated tool for detection of peripheral artery disease using electronic health records**

Ghazouri, I<sup>†1</sup>, Amal, S<sup>†1</sup>, Ho, V<sup>†1</sup>, Safarnejad, L<sup>1</sup>, Cabot, J<sup>1</sup>, Brown-Johnson, CG<sup>2</sup>, Leeper, N<sup>1,3</sup>, Asch, S<sup>2</sup>, Shah, NH<sup>3</sup>, Ross, EG\*<sup>1,3</sup>

<sup>1</sup>Division of Vascular Surgery, Department of Surgery, Stanford University School of Medicine, Stanford, CA; <sup>2</sup>Primary Care and Population Health, Department of Medicine, Stanford, CA; <sup>3</sup>Center for Biomedical Informatics Research, Department of Medicine, Stanford University School of Medicine, Stanford, CA

## Supplemental materials

**Supplemental Table 1.** All codes used in definition of peripheral artery disease cohort.

| PAD Identification Codes      | ICD-9                                                                                                                                                                                                                                                                                                                                                                                                         | ICD-10                                                                                                                                                                                                                                                                                                                                                                                   | ICD-9-CM                   | ICD-10-PCS                                                                                                                                                                                                                                                                                                                                                                                                                                                                                                                                      | CPT                                                                                                                                                                                                                                                                                                                                                                                                                                                                                                                                                                                                                                                                 | Definition                                                                                       |
|-------------------------------|---------------------------------------------------------------------------------------------------------------------------------------------------------------------------------------------------------------------------------------------------------------------------------------------------------------------------------------------------------------------------------------------------------------|------------------------------------------------------------------------------------------------------------------------------------------------------------------------------------------------------------------------------------------------------------------------------------------------------------------------------------------------------------------------------------------|----------------------------|-------------------------------------------------------------------------------------------------------------------------------------------------------------------------------------------------------------------------------------------------------------------------------------------------------------------------------------------------------------------------------------------------------------------------------------------------------------------------------------------------------------------------------------------------|---------------------------------------------------------------------------------------------------------------------------------------------------------------------------------------------------------------------------------------------------------------------------------------------------------------------------------------------------------------------------------------------------------------------------------------------------------------------------------------------------------------------------------------------------------------------------------------------------------------------------------------------------------------------|--------------------------------------------------------------------------------------------------|
| Cases (codes used to include) | 440.2*, 440.3*, 440.8, 440.4, 443.9, 736.3*, 736.4*, 736.5, 736.6, 736.7*, 736.8*, 736.9, 735.*, 754.3*, 754.4*, 754.5*, 754.6*, 754.7*, 755.02, 755.13, 755.14, 755.3, 755.4, 755.6*, 755.8, 759.7, 759.89, 895.*, 896.*, 897.*, 820.*, 821.*, 822.*, 823.*, 824.*, 825.*, 826.*, 827.*, 828.*, 829.*, 835.*, 836.*, 837.*, 838.*, 904.*, 928.*, 929.*, 959.6, 959.7, 996.4*, 996.66, 996.67, 996.77, 996.78 | I70.2*, I70.3*, I70.4*, I70.5*, I70.6*, I70.7*, I70.8, I70.92, I73.9, M21.05*, M21.06*, M21.07*, M21.15*, M21.16*, M21.17*, M21.7*, M21.869, M21.6X*, M21.85*, M21.86*, M21.95*, M21.96*, M20.1*, M20.2*, M20.3*, M20.*, M20.5*, M20.6*, Q65.***, Q68.1*, Q68.2*, Q68.3*, Q68.4*, Q68.5*, Q66.3*, Q66.4*, Q66.5*, Q66.6*, Q66.7*, Q66.8*, Q69.2*, Q70.2*, Q70.3*, Q72.***, Q74.8, Q74.9, | 39.50, 39.90, 38.18, 84.1* | 047C3*, 047D3*, 047H3*, 047J3*, 047K3*, 047L3*, 047M3*, 047N3*, 047P3*, 047Q3*, 047R3*, 047S3*, 047T3*, 047U3*, 047V3*, 047W3*, 047Y3*, 04C00ZZ, 04C03ZZ, 04CC0Z*, 04CC3Z*, 04CC4Z*, 04CD*, 04CH*, 04CJ*, 04CK*, 04CK*, 04CL*, 04CM*, 04CN*, 04CP*, 04CQ*, 04CR*, 04CS*, 04CT*, 04CU*, 04CV*, 04CY*, 04100J7, 04100J8, 04100JF, 04100JG, 04100JH, 04100JJ, 04100JK, 041C0JD, 041C0JH, 041D0JF, 041D0JJ, 041H0JH, 041H0KJ, 041H4JH, 041J0JJ, 041J4JJ, 041K0J*, 041K0Z*, 041L09*, 041L0J*, 041L0K*, 041L0Z*, 041M*, 041N*, 041S0JQ, 041U0AP, 0Y6* | 37205, 37206, 37207, 37208, 37236, 37237, 37184, 37185, 37186, 35302, 35303, 35304, 35305, 35306, 35331, 35351, 35355, 35361, 35363, 35371, 35372, 35381, 35452, 35454, 35456, 35459, 35470, 35472, 35473, 35474, 35483, 35492, 35493, 35495, 35521, 35533, 35537, 35538, 35539, 35540, 35556, 35558, 35563, 35565, 35566, 35571, 35583, 35585, 35587, 35621, 35623, 35637, 35638, 35646, 35647, 35654, 35656, 35661, 35663, 35665, 35666, 35671, 35700, 35876, 35879, 35881, 35883, 35884, 37184, 37185, 37186, 37205, 37206, 37207, 37208, 0236T, 0237T, 0238T, 37225, 37224, 37227, 37226, 37222, 37223, 37220, 37221, 37229, 37228, 37231, 37230, 37233, 37232, | Defined as at least 2 mentions of a concept code (ICD-9/10, CPT, Observation) in a visit or note |

|                                        |                                           |                                                                                                                                                                                                                                                                              |                                     |                                                                                                                                                                                                                                                                                                                                                                                                                                                                                                |                                                                                                                                                                                                                                                                                                                                                                                                                                                                         |  |
|----------------------------------------|-------------------------------------------|------------------------------------------------------------------------------------------------------------------------------------------------------------------------------------------------------------------------------------------------------------------------------|-------------------------------------|------------------------------------------------------------------------------------------------------------------------------------------------------------------------------------------------------------------------------------------------------------------------------------------------------------------------------------------------------------------------------------------------------------------------------------------------------------------------------------------------|-------------------------------------------------------------------------------------------------------------------------------------------------------------------------------------------------------------------------------------------------------------------------------------------------------------------------------------------------------------------------------------------------------------------------------------------------------------------------|--|
|                                        |                                           | Q89.7,<br>E78.71,<br>E78.72,<br>Q87.2,<br>Q87.3,<br>Q87.5,<br>Q87.81,<br>Q87.82,<br>Q87.89,<br>Q89.8,<br>S72.**,<br>S82.**,<br>S92.**,<br>T14.8*,<br>M24.35*,<br>M24.36*,<br>M24.37*,<br>S83.**,<br>S93.**,<br>S75.**,<br>S79.**,<br>S99.**,<br>S77.**,<br>S89.**,<br>T84.** |                                     |                                                                                                                                                                                                                                                                                                                                                                                                                                                                                                | 37235, 37234,<br>35548,<br><br>27590, 27591<br>,27592, 27598,<br>27888, 27889,<br>28800, 28805                                                                                                                                                                                                                                                                                                                                                                          |  |
| Controls<br>(codes used to<br>exclude) | 440.2*, 440.3*,<br>440.8, 440.4,<br>443.9 | I70.2*,<br>I70.3*,<br>I70.4*,<br>I70.5*,<br>I70.6*,<br>I70.7*,<br>I70.8,<br>I70.92,<br>I73.9                                                                                                                                                                                 | 39.50,<br>39.90,<br>38.18,<br>84.1* | 047C3*, 047D3*,<br>047H3*, 047J3*,<br>047K3*, 047L3*,<br>047M3*, 047N3*,<br>047P3*, 047Q3*,<br>047R3*, 047S3*,<br>047T3*, 047U3*,<br>047V3*, 047W3*,<br>047Y3*, 04C00ZZ,<br>04C03ZZ,<br>04CC0Z*,<br>04CC3Z*,<br>04CC4Z*, 04CD*,<br>04CH*, 04CJ*,<br>04CK*, 04CK*,<br>04CL*, 04CM*,<br>04CN*, 04CP*,<br>04CQ*, 04CR*,<br>04CS*, 04CT*,<br>04CU*, 04CV*,<br>04CY*, 04100J7,<br>04100J8, 04100JF,<br>04100JG, 04100JH,<br>04100JJ, 04100JK,<br>041C0JD, 041C0JH,<br>041D0JF, 041D0JJ,<br>041H0JH, | 37205, 37206,<br>37207, 37208,<br>37236, 37237,<br>37184, 37185,<br>37186, 35302,<br>35303, 35304,<br>35305, 35306,<br>35331, 35351,<br>35355, 35361,<br>35363, 35371,<br>35372, 35381,<br>35452, 35454,<br>35456, 35459,<br>35470, 35472,<br>35473, 35474,<br>35483, 35492,<br>35493, 35495,<br>35521, 35533,<br>35537, 35538,<br>35539, 35540,<br>35556, 35558,<br>35563, 35565,<br>35566, 35571,<br>35583, 35585,<br>35587, 35621,<br>35623, 35637,<br>35638, 35646, |  |

|  |  |  |  |                                                                                                                                                     |                                                                                                                                                                                                                                                                                                                                                                                                                               |  |
|--|--|--|--|-----------------------------------------------------------------------------------------------------------------------------------------------------|-------------------------------------------------------------------------------------------------------------------------------------------------------------------------------------------------------------------------------------------------------------------------------------------------------------------------------------------------------------------------------------------------------------------------------|--|
|  |  |  |  | 041H0KJ,<br>041H4JH, 041J0JJ,<br>041J4JJ, 041K0J*,<br>041K0Z*, 041L09*,<br>041L0J*, 041L0K*,<br>041L0Z*, 041M*,<br>041N*, 041S0JQ,<br>041U0AP, 0Y6* | 35647, 35654,<br>35656, 35661,<br>35663, 35665,<br>35666, 35671,<br>35700, 35876,<br>35879, 35881,<br>35883, 35884,<br>37184, 37185,<br>37186, 37205,<br>37206, 37207,<br>37208, 0236T,<br>0237T, 0238T,<br>37225, 37224,<br>37227, 37226,<br>37222, 37223,<br>37220, 37221,<br>37229, 37228,<br>37231, 37230,<br>37233, 37232,<br>37235, 37234,<br>35548, 27590,<br>27591 ,27592,<br>27598, 27888,<br>27889, 28800,<br>28805 |  |
|--|--|--|--|-----------------------------------------------------------------------------------------------------------------------------------------------------|-------------------------------------------------------------------------------------------------------------------------------------------------------------------------------------------------------------------------------------------------------------------------------------------------------------------------------------------------------------------------------------------------------------------------------|--|

ICD-9/ICD-10 – International Classification of Diseases, 9<sup>th</sup> Version/10<sup>th</sup> Version. ICD-9-CM International Classification of Diseases, 9<sup>th</sup> Version – Clinical Modification. ICD-10-PCS - International Classification of Diseases, 10<sup>th</sup> Version – Procedure Coding System.

**Supplemental Table 2. Codes used to define co-morbidities used in traditional risk factor modeling.**

| Disease                 | ICD-9                                                                                                                                                                                         | ICD-10                                                                                                                                  | ICD-9-CM                 | ICD-10-PCS                                                                                                                                      | CPT                               | Definition                                                                                       |
|-------------------------|-----------------------------------------------------------------------------------------------------------------------------------------------------------------------------------------------|-----------------------------------------------------------------------------------------------------------------------------------------|--------------------------|-------------------------------------------------------------------------------------------------------------------------------------------------|-----------------------------------|--------------------------------------------------------------------------------------------------|
| Cerebrovascular disease | 434, 434.01, 434.1, 434.9, 434.11, 434.91, 437, 437.1, 435, 435.1, 435.2, 435.3, 435.8, 435.9, 433, 433.01, 433.1, 433.11, 433.2, 433.21, 433.21, 433.3, 433.8, 433.31, 433.81, 433.9, 433.91 | I66.01, I66.02, I66.03, I66.09, I66.11, I66.12, I66.13, I66.19, I66.21, I66.22, I66.23, I66.29, I66.3, I66.8, I63.30, I63.311, I63.312, | 38.12, 0.61, 39.28, 0.63 | 03CL***, 03CH***, 03CJ***, 03CK***, 03CM***, 03CN***, 03CP***, 03CQ***, 03CG***, 037H***, 037J***, 037K***, 037L***, 037M***, 037N***, 037H***, | 35301, 37215, 37216, 37195, 61645 | Defined as at least 2 mentions of a concept code (ICD-9/10, CPT, Observation) in a visit or note |

|  |  |                                                                                                                                                                                                                                                                                                                                                                                                                                                                                                                                                                                                                                                                                              |  |                                                         |  |  |
|--|--|----------------------------------------------------------------------------------------------------------------------------------------------------------------------------------------------------------------------------------------------------------------------------------------------------------------------------------------------------------------------------------------------------------------------------------------------------------------------------------------------------------------------------------------------------------------------------------------------------------------------------------------------------------------------------------------------|--|---------------------------------------------------------|--|--|
|  |  | I63.313,<br>I63.319,<br>I63.321,<br>I63.322,<br>I63.323,<br>I63.329,<br>I63.331,<br>I63.332,<br>I63.333,<br>I63.339,<br>I63.341,<br>I63.342,<br>I63.343,<br>I63.349,<br>I63.39,<br>I63.6, I66.9,<br>I63.40,<br>I63.411,<br>I63.412,<br>I63.413,<br>I63.419,<br>I63.421,<br>I63.422,<br>I63.423,<br>I63.429,<br>I63.431,<br>I63.432,<br>I63.433,<br>I63.439,<br>I63.441,<br>I63.442,<br>I63.443,<br>I63.449,<br>I63.49,<br>I63.50,<br>I63.511,<br>I63.512,<br>I63.513,<br>I63.519,<br>I63.521,<br>I63.522,<br>I63.523,<br>I63.529,<br>I63.531,<br>I63.532,<br>I63.533,<br>I63.539,<br>I63.541,<br>I63.542,<br>I63.543,<br>I63.549,<br>I63.59,<br>I63.8, I63.9,<br>I67.2,<br>I67.82,<br>G45.0, |  | 037J***,<br>037K***,<br>037L***,<br>037M***,<br>037N*** |  |  |
|--|--|----------------------------------------------------------------------------------------------------------------------------------------------------------------------------------------------------------------------------------------------------------------------------------------------------------------------------------------------------------------------------------------------------------------------------------------------------------------------------------------------------------------------------------------------------------------------------------------------------------------------------------------------------------------------------------------------|--|---------------------------------------------------------|--|--|

|                         |                                                                                                                                          |                                                                                                                                                                                                                                                                                                                                                                                                                                                                                                                                     |                                                                                    |                                                                                           |                                                                              |                                                                              |
|-------------------------|------------------------------------------------------------------------------------------------------------------------------------------|-------------------------------------------------------------------------------------------------------------------------------------------------------------------------------------------------------------------------------------------------------------------------------------------------------------------------------------------------------------------------------------------------------------------------------------------------------------------------------------------------------------------------------------|------------------------------------------------------------------------------------|-------------------------------------------------------------------------------------------|------------------------------------------------------------------------------|------------------------------------------------------------------------------|
|                         |                                                                                                                                          | G45.8,<br>G45.1,<br>G45.2,<br>G45.9,<br>I65.1,<br>I63.22,<br>I63.02,<br>I63.22,<br>I65.29,<br>I65.21,<br>I65.22,<br>I65.23,<br>I63.031,<br>I63.032,<br>I63.033,<br>I63.039,<br>I63.131,<br>I63.132,<br>I63.133,<br>I63.139,<br>I63.239,<br>I65.09,<br>I65.01,<br>I65.02,<br>I65.03,<br>I63.219,<br>I63.211,<br>I63.212,<br>I63.213,<br>I63.011,<br>I63.012,<br>I63.013,<br>I63.019,<br>I63.111,<br>I63.112,<br>I63.113,<br>I63.119,<br>I65.8,<br>I63.59,<br>I63.09,<br>I63.19,<br>I63.29,<br>I65.9,<br>I63.20,<br>I63.00,<br>I63.10 |                                                                                    |                                                                                           |                                                                              |                                                                              |
| Coronary artery disease | 413, 413.1,<br>413.9, 411.1,<br>410, 410.01,<br>410.02, 410.1,<br>410.11, 410.12,<br>410.2, 410.21,<br>410.22, 410.4,<br>410.41, 410.42, | I20.8, I20.0,<br>I21.01,<br>I21.02,<br>I21.09,<br>I21.19,<br>I21.11,<br>I21.21,<br>I21.29,                                                                                                                                                                                                                                                                                                                                                                                                                                          | 36.01,<br>36.02,<br>36.03,<br>36.04,<br>36.05,<br>36.06,<br>36.07,<br>36.09, 0.66, | Z98.61,<br>Z95.5,<br>0270***,<br>0271***,<br>0272***,<br>0273***,<br>02C0***,<br>02C1***, | 92920,<br>92921,<br>92924,<br>92925,<br>92928,<br>92929,<br>92933,<br>92934, | Defined as at least 2 mentions of a concept code (ICD9/10, CPT, Observation) |

|  |                                                                                                                                                                                                                                                                                                               |                                                                                                                                                                                                                                                                                                                                                                                                                                                                                                                                                                                                                                                 |                                                                                                                         |                                                                                                                                                                                                                               |                                                                                                                                                                                                                                                                                               |  |
|--|---------------------------------------------------------------------------------------------------------------------------------------------------------------------------------------------------------------------------------------------------------------------------------------------------------------|-------------------------------------------------------------------------------------------------------------------------------------------------------------------------------------------------------------------------------------------------------------------------------------------------------------------------------------------------------------------------------------------------------------------------------------------------------------------------------------------------------------------------------------------------------------------------------------------------------------------------------------------------|-------------------------------------------------------------------------------------------------------------------------|-------------------------------------------------------------------------------------------------------------------------------------------------------------------------------------------------------------------------------|-----------------------------------------------------------------------------------------------------------------------------------------------------------------------------------------------------------------------------------------------------------------------------------------------|--|
|  | 410.3, 410.31,<br>410.32, 410.5,<br>410.51, 410.52,<br>410.6, 410.61,<br>410.62, 410.8,<br>410.81, 410.82,<br>410.7, 410.71,<br>410.72, 410.9,<br>410.91, 410.92,<br>412, 429.71,<br>429.79, 414,<br>414.01, 414.02,<br>414.03, 414.04,<br>414.05, 414.06,<br>414.07, 414.2,<br>414.3, 414.4,<br>414.8, 414.9 | I21.4, I21.3,<br>I21.3,<br>I22.**,<br>I25.2, I23.1,<br>I23.2, I23.0,<br>I23.3, I23.4,<br>I23.5, I23.6,<br>I23.7, I23.8,<br>I24.1,<br>I25.10,<br>I25.810,<br>I25.811,<br>I25.812,<br>I25.110,<br>I25.111,<br>I25.118,<br>I25.119,<br>I25.700,<br>I25.701,<br>I25.708,<br>I25.709,<br>I25.710,<br>I25.711,<br>I25.718,<br>I25.719,<br>I25.720,<br>I25.721,<br>I25.728,<br>I25.729,<br>I25.730,<br>I25.731,<br>I25.738,<br>I25.739,<br>I25.750,<br>I25.751,<br>I25.758,<br>I25.759,<br>I25.760,<br>I25.761,<br>I25.768,<br>I25.769,<br>I25.790,<br>I25.791,<br>I25.798,<br>I25.799,<br>I25.82,<br>I25.83,<br>I25.84,<br>I25.5,<br>I25.89,<br>I25.9 | V45.82,<br>36.1, 36.11,<br>36.12,<br>36.13,<br>36.14,<br>36.15,<br>36.16,<br>36.17,<br>36.18,<br>36.19, 36.2,<br>V45.81 | 02C2***,<br>02C3***,<br>02703ZZ,<br>02704ZZ,<br>02713ZZ,<br>02714ZZ,<br>02723ZZ,<br>02724ZZ,<br>02733ZZ,<br>02734ZZ,<br>3E07017,<br>3E070PZ,<br>3E07317,<br>3E073PZ,<br>Z95.1,<br>0210***,<br>0211***,<br>0212***,<br>0213*** | 92937,<br>92938,<br>92941,<br>92943,<br>92944,<br>92980,<br>92981,<br>92982,<br>92984,<br>92995,<br>92996,<br>92973,<br>92974,<br>33510,<br>33511,<br>33512,<br>33513,<br>33514,<br>33516,<br>33517,<br>33518,<br>33519,<br>33521,<br>33522,<br>33523,<br>33533,<br>33534,<br>33535,<br>33536 |  |
|--|---------------------------------------------------------------------------------------------------------------------------------------------------------------------------------------------------------------------------------------------------------------------------------------------------------------|-------------------------------------------------------------------------------------------------------------------------------------------------------------------------------------------------------------------------------------------------------------------------------------------------------------------------------------------------------------------------------------------------------------------------------------------------------------------------------------------------------------------------------------------------------------------------------------------------------------------------------------------------|-------------------------------------------------------------------------------------------------------------------------|-------------------------------------------------------------------------------------------------------------------------------------------------------------------------------------------------------------------------------|-----------------------------------------------------------------------------------------------------------------------------------------------------------------------------------------------------------------------------------------------------------------------------------------------|--|

|                |                                                                                                |                                                            |               |                                     |                            |                                                                                                                                                                          |
|----------------|------------------------------------------------------------------------------------------------|------------------------------------------------------------|---------------|-------------------------------------|----------------------------|--------------------------------------------------------------------------------------------------------------------------------------------------------------------------|
| Heart failure  | 398.91, 402.01, 402.11, 402.91, 404.01, 404.03, 404.11, 404.13, 404.91, 404.93, 425.**, 428.** | I09.81, I11.0, I13.0, I13.2, I25.5, I42.*, I50.**, Z95.811 | 37.66, V43.21 | 02HA0QZ, 02HA4QZ, 02HA3QZ           | 33979, 33982, 33983, 93750 | Defined as at least 2 mentions of a concept code (ICD9/10, CPT, Observation)                                                                                             |
| Hypertension   | 401.**, 402.**, 403.**, 404.**, 405.**                                                         | I10.**, I11.**, I12.**, I13.**, I15.**                     |               |                                     |                            | Defined using at least 2 mentions of a concept code (ICD9/10, Observation)                                                                                               |
| Diabetes       | 250.**                                                                                         | E10.**, E12.**, E13.**, E14.**                             |               |                                     |                            | Defined using at least 1 mention of a concept code (ICD9/10, Observation) AND on at least 1 glycemic medication OR Hemaglobin A1c (hgbA1c) > 6.4                         |
| Hyperlipidemia | 272.0*, 272.1*, 272.2*, 272.4*                                                                 | E78.0*, E78.1*, E78.2*, E78.4*, E78.5*                     |               |                                     |                            | Defined using at least 1 mention of a concept code (ICD9/10, Observation) AND on at least 1 lipid medication OR cholesterol >= 200 OR LDL >= 100 OR triglycerides >= 150 |
| Obesity        | 278.00, 278.01                                                                                 | E66.0, E66.01, E66.09, E66.9                               |               |                                     |                            | Defined using at least 2 mentions of a concept code (ICD9/10, Observation) OR a body mass index measurement >= 30                                                        |
| Current smoker |                                                                                                |                                                            | 305.1         | F17.210, F12.213, F17.218, F17.219, |                            | At least 2 codes during their care                                                                                                                                       |

|  |  |  |  |                                                                                                                                      |  |  |
|--|--|--|--|--------------------------------------------------------------------------------------------------------------------------------------|--|--|
|  |  |  |  | O99.330,<br>O99.331,<br>O99.332,<br>O99.333,<br>O99.334,<br>O99.335,<br>T65.221,<br>T65.222,<br>T65.223,<br>T65.224,<br>Z71.6, Z72.0 |  |  |
|--|--|--|--|--------------------------------------------------------------------------------------------------------------------------------------|--|--|

ICD-9/ICD-10 – International Classification of Diseases, 9<sup>th</sup> Version/10<sup>th</sup> Version. ICD-9-CM International Classification of Diseases, 9<sup>th</sup> Version – Clinical Modification. ICD-10-PCS - International Classification of Diseases, 10<sup>th</sup> Version – Procedure Coding System.

**Supplemental Table 3.** Logistic regression model performance for outer 5-folds.

|                | <b>AUC</b> | <b>Specificity</b> | <b>Sensitivity</b> | <b>Standard Dev.</b> | <b>95% CI</b> |
|----------------|------------|--------------------|--------------------|----------------------|---------------|
| <b>Fold 1</b>  | 0.807      | 0.736              | 0.73               | 0.0108               | 0.786-0.818   |
| <b>Fold 2</b>  | 0.798      | 0.678              | 0.774              | 0.0105               | 0.778-0.822   |
| <b>Fold 3</b>  | 0.819      | 0.742              | 0.751              | 0.0103               | 0.798-0.839   |
| <b>Fold 4</b>  | 0.826      | 0.712              | 0.792              | 0.0099               | 0.807-0.846   |
| <b>Fold 5</b>  | 0.802      | 0.782              | 0.680              | 0.0103               | 0.782-0.822   |
| <b>Average</b> | 0.810      | 0.730              | 0.746              |                      |               |

AUC – area under the curve

**Supplemental Table 4.** Nomogram model performance for outer 5-folds.

|                | <b>AUC</b> | <b>Specificity</b> | <b>Sensitivity</b> | <b>Standard Dev.</b> | <b>95% CI</b> |
|----------------|------------|--------------------|--------------------|----------------------|---------------|
| <b>Fold 1</b>  | 0.641      | 0.708              | 0.558              | 0.0270               | 0.588-0.694   |
| <b>Fold 2</b>  | 0.616      | 0.551              | 0.603              | 0.0279               | 0.567-0.671   |
| <b>Fold 3</b>  | 0.633      | 0.538              | 0.644              | 0.0280               | 0.579-0.688   |
| <b>Fold 4</b>  | 0.658      | 0.598              | 0.680              | 0.0276               | 0.604-0.712   |
| <b>Fold 5</b>  | 0.660      | 0.688              | 0.610              | 0.0272               | 0.607-0.713   |
| <b>Average</b> | 0.642      | 0.617              | 0.619              |                      |               |

Nomogram scores are calculated based on patient demographic features in accordance to Duval et al (2012). AUC – area under the curve.

**Supplemental Table 5.** Machine learning model performance for outer 5-folds using random forest architecture.

|  | <b>AUC</b> | <b>Specificity</b> | <b>Sensitivity</b> | <b>Standard Dev.</b> | <b>95% CI</b> |
|--|------------|--------------------|--------------------|----------------------|---------------|
|--|------------|--------------------|--------------------|----------------------|---------------|

|                |       |       |       |        |             |
|----------------|-------|-------|-------|--------|-------------|
| <b>Fold 1</b>  | 0.908 | 0.797 | 0.845 | 0.0061 | 0.896-0.919 |
| <b>Fold 2</b>  | 0.904 | 0.802 | 0.819 | 0.0061 | 0.892-0.916 |
| <b>Fold 3</b>  | 0.911 | 0.832 | 0.817 | 0.0063 | 0.898-0.923 |
| <b>Fold 4</b>  | 0.909 | 0.815 | 0.836 | 0.0062 | 0.897-0.921 |
| <b>Fold 5</b>  | 0.914 | 0.792 | 0.852 | 0.0056 | 0.902-0.925 |
| <b>Average</b> | 0.909 | 0.808 | 0.834 |        |             |

AUC – area under the curve; CI – Confidence interval.

**Supplemental Table 6.** Deep learning model performance for outer 5-folds.

|                | <b>AUC</b> | <b>Specificity</b> | <b>Sensitivity</b> | <b>Standard Dev.</b> | <b>95% CI</b> |
|----------------|------------|--------------------|--------------------|----------------------|---------------|
| <b>Fold 1</b>  | 0.968      | 0.895              | 0.944              | 0.0018               | 0.959-0.976   |
| <b>Fold 2</b>  | 0.963      | 0.860              | 0.970              | 0.0016               | 0.954-0.972   |
| <b>Fold 3</b>  | 0.956      | 0.869              | 0.922              | 0.0023               | 0.946-0.966   |
| <b>Fold 4</b>  | 0.956      | 0.885              | 0.944              | 0.0022               | 0.945-0.967   |
| <b>Fold 5</b>  | 0.974      | 0.868              | 0.970              | 0.0016               | 0.967-0.981   |
| <b>Average</b> | 0.963      | 0.875              | 0.950              |                      |               |

AUC – area under the curve; CI – Confidence interval.
